# Supplementary material for: Metal–organic complex-functionalized protein nanopore sensor for aromatic amino acids chiral recognition
Source: Royal Society of Chemistry journal article supplement (doi:10.1039/c7an00097a), 2017-01-01
Supplement: c7an00097a1.pdf [file c7an00097a1.pdf]

**Electronic supplementary information (ESI)**

**Metal-organic complex functionalized protein nanopore  
sensor for aromatic amino acids chiral recognition**

Yanli Guo, Aihua Niu, Feifei Jian, Ying Wang, Fujun Yao, Yongfeng Wei,  
Lei Tian and Xiaofeng Kang\*

Key Laboratory of Synthetic and Natural Functional Molecule Chemistry  
College of Chemistry & Materials Science  
Northwest University  
1 Xuefu Ave., Chang'an District, Xi'an, 710127 (P.R.China)  
E-mail: kangxf@nwu.edu.cn

\*Corresponding author: Prof. Xiao-feng Kang  
College of Chemistry & Materials Science  
Northwest University, Xi'an 710069, P. R. China  
Fax: +86-029-88302604;  
Tel: +86-029-88302604;  
E-mail: kangxf@nwu.edu.cn

---

## Supporting Figures and table

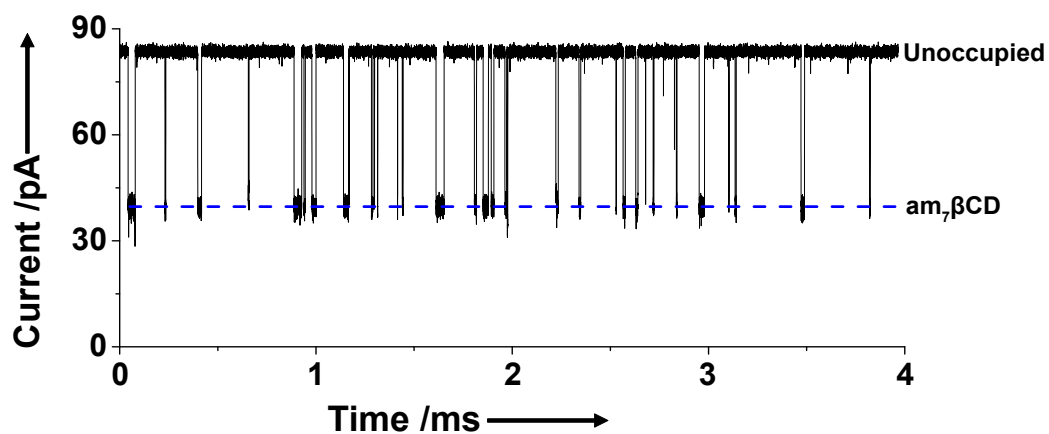

**Fig. S1** Representative current traces showing no detectable current block in open and am<sub>7</sub>βCD block current levels for a mixture of 20 nature L-α-amino acids (AAS) in (M113R)<sub>7</sub> nanopore. Condition: 40 μM am<sub>7</sub>βCD added from the trans compartment and a mixture of AAS (20 μM of each L-α-amino acid) from the cis side, 1 M NaCl, 10 mM MOPS, pH 8.0, +100 mV. The same phenomena is for hepta-6-sulfato-βCD (S<sub>7</sub>βCD) as an adapter.

**a**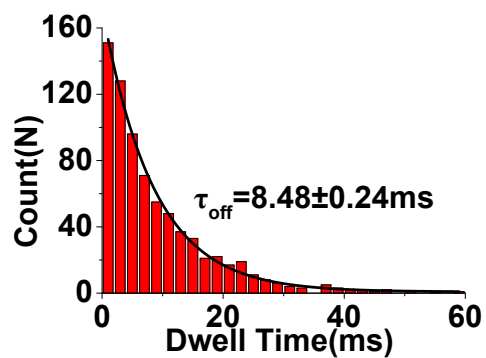**b**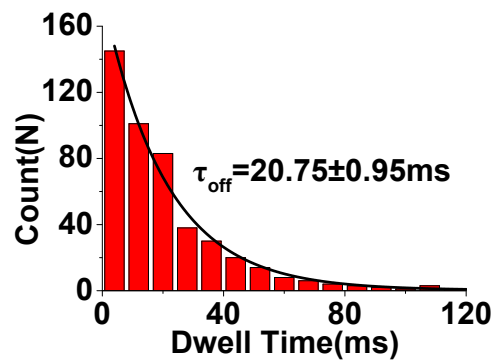

**Fig. S2** Dwell-time histograms with exponential fits for the events arising from (a) am<sub>7</sub>βCD and (b) am<sub>7</sub>βCD-Cu<sup>II</sup>. Experiment condition: 1 M NaCl, 10 mM MOPS buffer, pH 8.0, +100mV, 40 μM am<sub>7</sub>βCD and 20 μM CuCl<sub>2</sub> added from the trans compartment.

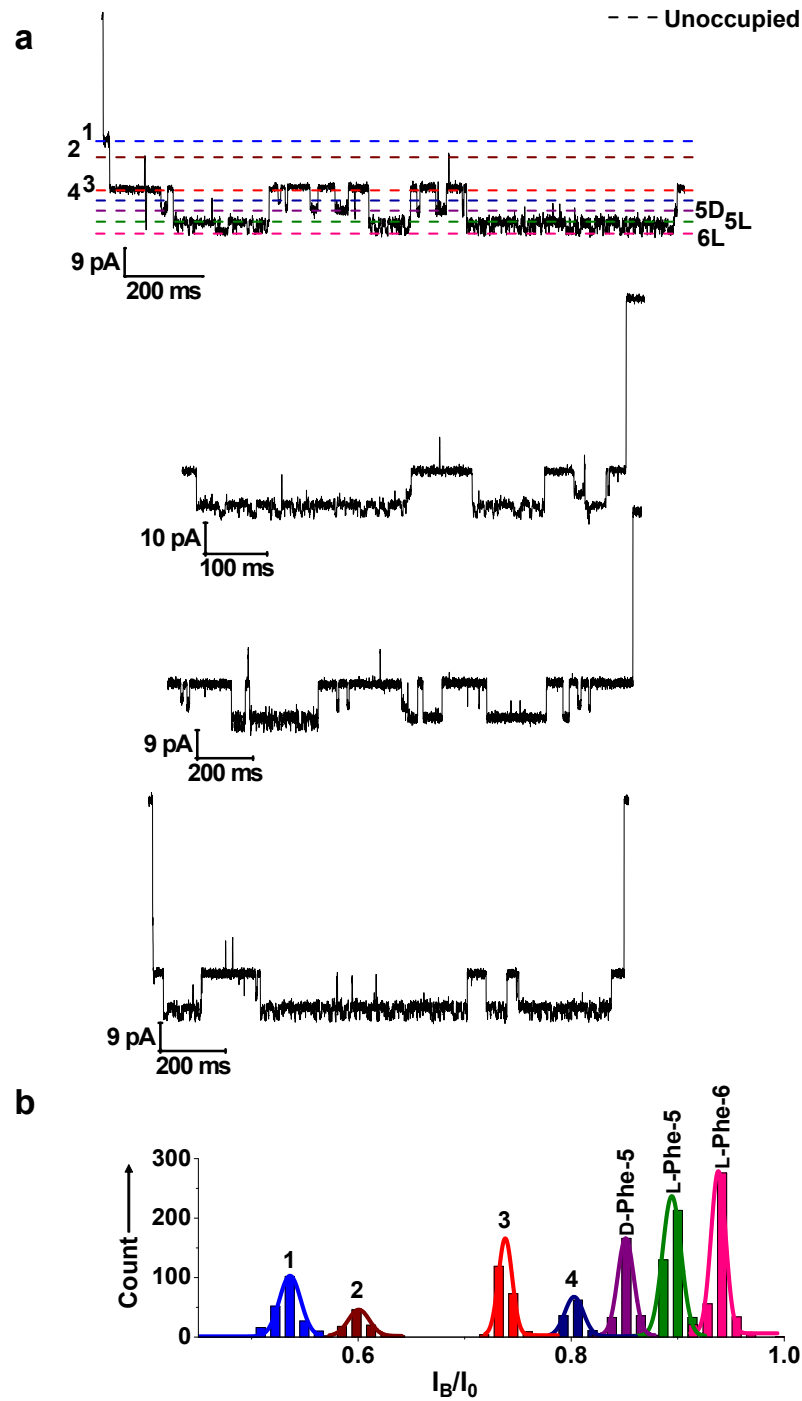

**Fig. S3** Representative extensive current traces (a) from single (M113R)<sub>7</sub> pore at +100 mV showing the interaction of pore with mixture of L-Phe, D-Phe, am<sub>7</sub>βCD and CuCl<sub>2</sub>. (b) The corresponding blockage current event histograms. Experiment condition: 40 μM am<sub>7</sub>βCD and 20 μM CuCl<sub>2</sub> added from the trans compartment and 20 μM L-Phe and 20 μM D-Phe from the cis side, 1 M NaCl, 10 mM MOPS buffer, pH 8.0.

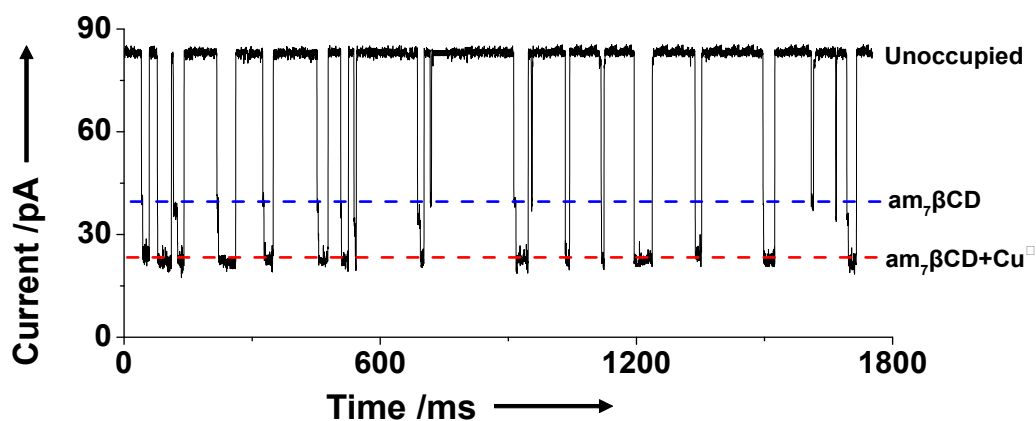

**Fig. S4** Representative current traces showing a mixture of L-aliphatic  $\alpha$ -amino acids no interaction with cyclodextrin metal complexes in nanopore. Condition: 40  $\mu$ M am<sub>7</sub>βCD and 20  $\mu$ M CuCl<sub>2</sub> added from the trans compartment and L-aliphatic  $\alpha$ -amino acids (20  $\mu$ M for each amino acid.) from the cis side, 1 M NaCl, 10 mM MOPS, pH 8.0, +100 mV.

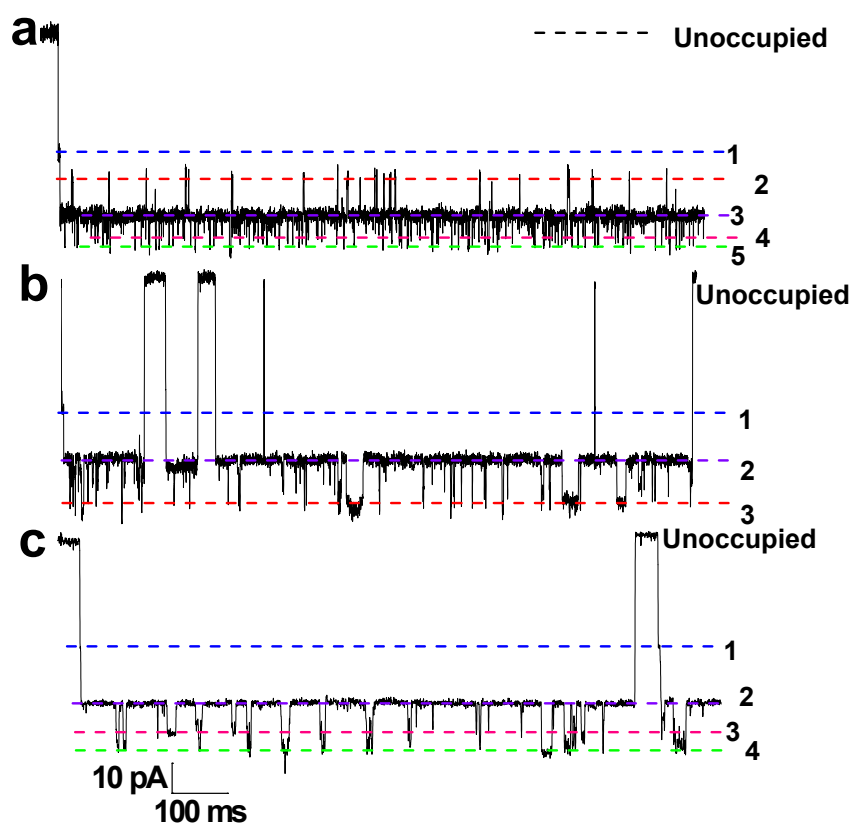

**Fig. S5** Representative current traces showing (a) L-dopar (b) 5-sulfosalicylic acid and (c) L-mandelic acid interaction with cyclodextrin metal complexes in nanopore. Condition: 40  $\mu\text{M}$   $\alpha\text{-CD}$  and 20  $\mu\text{M}$   $\text{CuCl}_2$  added from the trans compartment and 20  $\mu\text{M}$  for each aromatic compounds from the cis side, 1 M NaCl, 10 mM MOPS, pH 8.0, +100 mV.

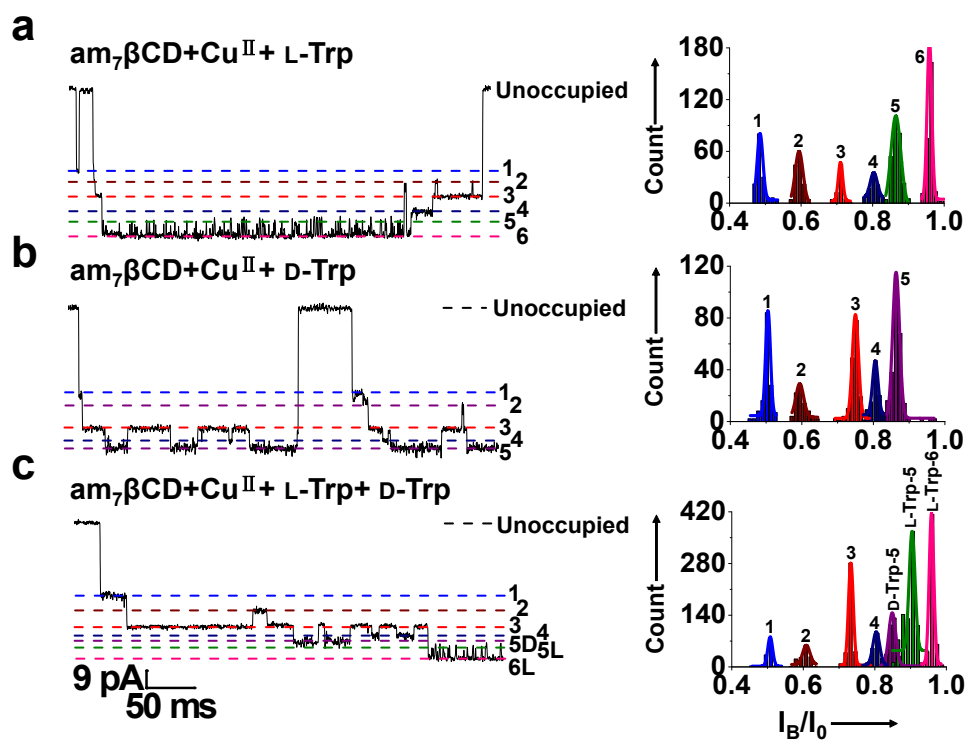

**Fig. S6** Interaction of L, D-tryptophan with cyclodextrin metal complexes in (M113R)<sub>7</sub> nanopore. Left: representative current traces for (a) L-Trp, am<sub>7</sub>βCD and CuCl<sub>2</sub>; (b) D-Trp, am<sub>7</sub>βCD and CuCl<sub>2</sub>; (c) L-Trp, D-Trp, am<sub>7</sub>βCD and CuCl<sub>2</sub>. Right: the corresponding blockage current event histograms. Condition: 40 μM am<sub>7</sub>βCD and 20 μM CuCl<sub>2</sub> added from the trans compartment and 20 μM L-Trp or (and) 20 μM D-Trp from the cis side, 1 M NaCl, 10 mM MOPS, pH 8.0, +100 mV.

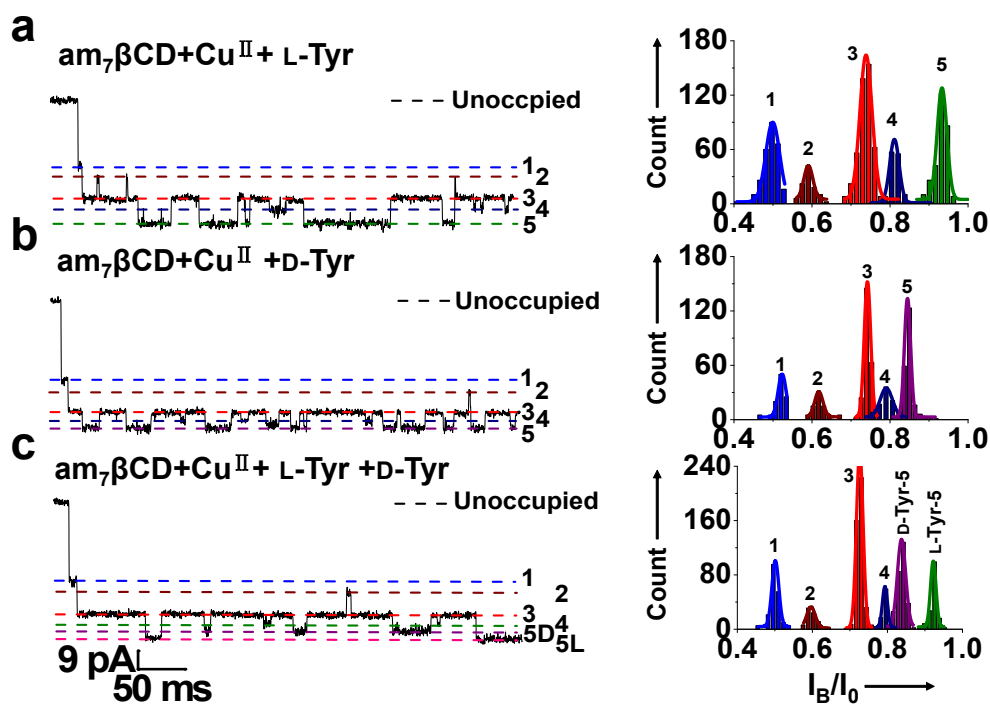

**Fig. S7** Interaction of L, D-tyrosine with cyclodextrin metal complexes in (M113R)<sub>7</sub> nanopore. Left: representative current traces for (a) L-Tyr, am<sub>7</sub>βCD and CuCl<sub>2</sub>; (b) D-Tyr, am<sub>7</sub>βCD and CuCl<sub>2</sub>; (c) L-Tyr, D-Tyr, am<sub>7</sub>βCD and CuCl<sub>2</sub>. Right: the corresponding blockage current event histograms. Condition: 40 μM am<sub>7</sub>βCD and 20 μM CuCl<sub>2</sub> added from the trans compartment and 20 μM L-Trp or (and) 20 μM D-Trp from the cis side, 1 M NaCl, 10 mM MOPS, pH 8.0, +100 mV.



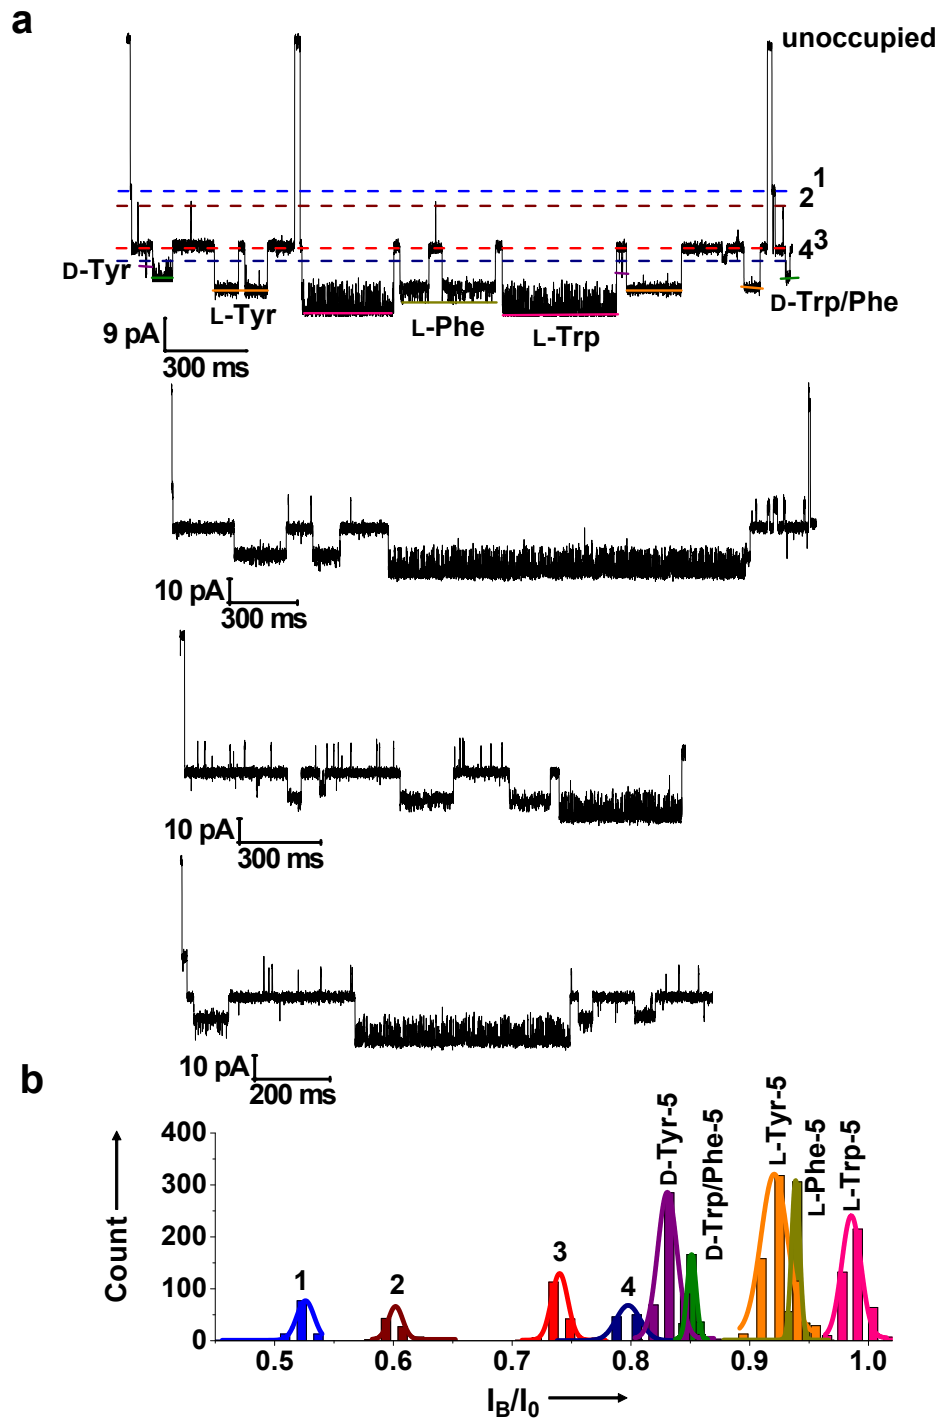

**Fig. S8** Extension of the current trace of Figure 3d and the corresponding current event histogram. Condition: 40  $\mu\text{M}$  am $\beta$ CD and 20  $\mu\text{M}$  CuCl $_2$  added from the trans compartment and a mixture of L- and D-aromatic amino acids (Phe, Trp and Tyr, 20  $\mu\text{M}$  for each enantiomer) from the cis side, 1 M NaCl, 10 mM MOPS, pH 8.0, +100 mV.

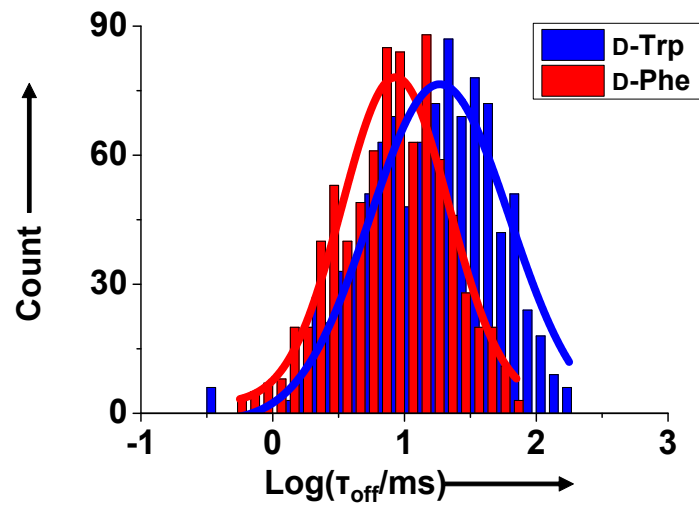

**Fig. S9** The histogram of the logarithmically binned dwell time for D-Trp and D-Phe (The corresponding trace see Figure S7). The experiment conditions were the same as in Figure S8.

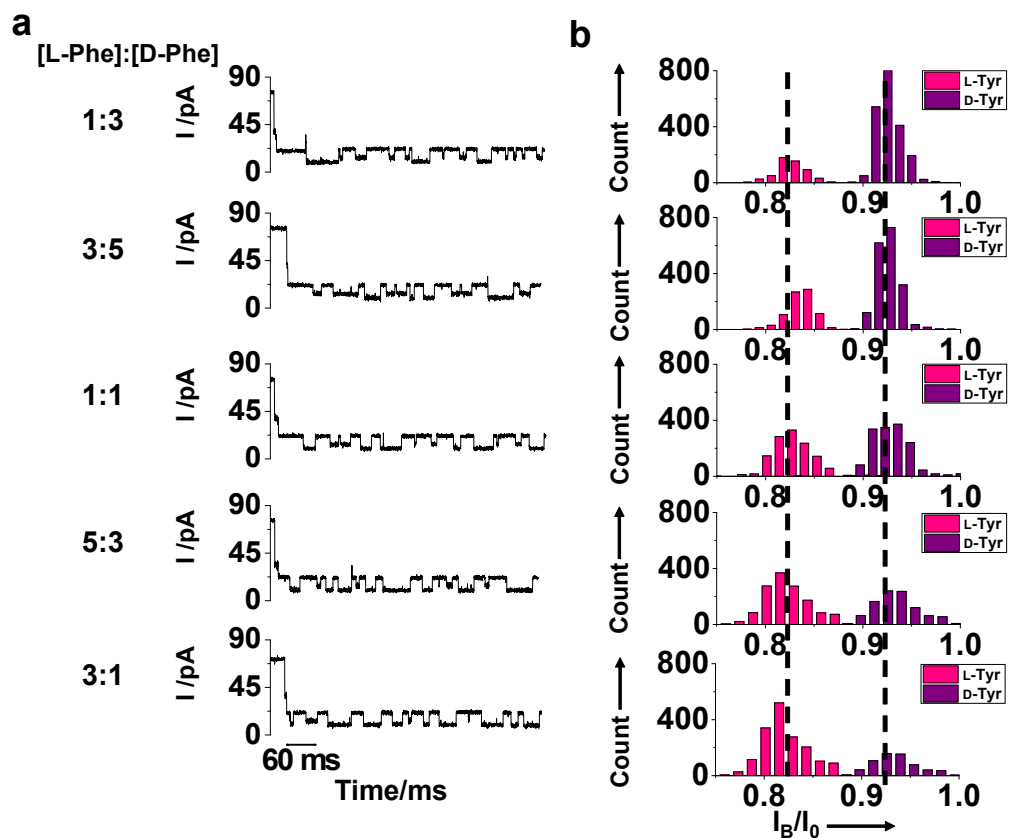

**Fig. S10** Nanopore detection of enantiomeric purity in a mixture of L- and D-tyrosine. (a) Representative single channel recordings of 40  $\mu$ M tyrosine enantiomers at various L- and D-Tyr concentration ratios in the presence of 40  $\mu$ M am $\gamma$ CD and 20  $\mu$ M CuCl $_2$ . (b) The corresponding concentration-dependent event amplitude histograms. Condition: am $\gamma$ CD and CuCl $_2$  added from the trans compartment and L- and D-Tyr from the cis side, 1 M NaCl, 10 mM MOPS, pH 8.0, +100 mV.

**Table S1** The *ee* of prepared and measured for the mixtures of L- and D-tyrosine at various concentration ration. The total concentration of Tyr was fixed to 40  $\mu$ M.

| [L-Tyr]:[ D-Tyr]       | 1:3             | 3:5             | 1:1            | 5:3            | 3:1            |
|------------------------|-----------------|-----------------|----------------|----------------|----------------|
| <i>ee</i> %(Prepared)  | -50.0           | -25.0           | 0              | 25.0           | 50.5           |
| <i>ee</i> %(Measured ) | -52.3 $\pm$ 1.7 | -27.5 $\pm$ 1.1 | -3.1 $\pm$ 0.7 | 25.8 $\pm$ 1.4 | 52.3 $\pm$ 2.1 |
